# Supplementary material
Source: Springer Nature journal article supplement (https://www.springermedizin.de/resource/supplementary/12913_2013_2684_MOESM12_ESM.pdf/9531122)
Supplement: MOESM12 [file 9531122]

Universitair Medisch Centrum **Concernstaf**  
**Kwaliteit en Veiligheid**  
Commissie Mensgebonden Onderzoek  
regio Arnhem - Nijmegen

547

Mw. drs. M.E.C. Hanskamp-Sebregts  
IWKV/Unit Interne Audit  
Huispost 529

Huispost 547  
Postbus 9101  
6500 HB Nijmegen

UMC St Radboud Centraal, route 553  
Geert Groteplein 10

T (024) 361 31 54

[cmo@iwkv.umcn.nl](mailto:cmo@iwkv.umcn.nl)  
[www.umcn.nl](http://www.umcn.nl)  
[www.cmoregio-a-n.nl](http://www.cmoregio-a-n.nl)

Date 13 maart 2013  
Reference YC/CMO 0142

**Title: The effects of auditing on patient safety in hospital care *Results in a Dutch hospital at ward level***

**Registration number: 2011/278**

Dear mrs. Hanskamp-Sebregts,

On behalf of the research ethics committee of the Radboud University Nijmegen Medical Centre I hereby let you know that the abovementioned study has been carried out in the Netherlands in accordance with the applicable rules concerning the review of research ethics committees and informed consent.

Best regards,  
On behalf of the CMO Regio Arnhem-Nijmegen



Dr. F. Huysmans, Chairman
